# Supplementary material
Source: PubMed Central journal article supplement (PMC4263659)
Supplement: 131044tablese1-e3.pdf [file 131044tablese1-e3.pdf]

**Table E1. Local Efficiency**

| ROI                        | <i>t</i> Statistic | <i>P</i> Value (corrected) |
|----------------------------|--------------------|----------------------------|
| rh.lateralorbitofrontal_11 | 2.64               | .0056                      |
| rh.parsopercularis_4       | 2.47               | .00861                     |
| rh.parsopercularis_5       | 3.35               | .00082                     |
| rh.parsopercularis_7       | 2.61               | .00608                     |
| rh.superiorfrontal_13      | 2.45               | .00918                     |
| rh.precentral_35           | 3.32               | .00087                     |
| rh.precentral_19           | 3.11               | .0016                      |
| rh.precentral_17           | 3.89               | .00016                     |
| rh.posteriorcingulate_9    | 3.53               | .00049                     |
| rh.isthmuscingulate_3      | 2.58               | .00652                     |
| rh.isthmuscingulate_1      | 3.96               | .00013                     |
| rh.isthmuscingulate_4      | 2.53               | .00748                     |
| rh.postcentral_3           | 3.01               | .00212                     |
| rh.postcentral_27          | 2.62               | .00593                     |
| rh.postcentral_13          | 2.52               | .00761                     |
| rh.supramarginal_2         | 3.15               | .00145                     |
| rh.inferiorparietal_23     | 3.24               | .00111                     |
| rh.precuneus_1             | 4.54               | .00002                     |
| rh.precuneus_3             | 4.33               | .00004                     |
| rh.precuneus_10            | 2.47               | .00871                     |
| rh.precuneus_11            | 2.43               | .00964                     |
| rh.cuneus_8                | 2.77               | .00403                     |
| rh.pericalcarine_1         | 3.32               | .00088                     |
| rh.pericalcarine_5         | 2.41               | .00993                     |
| rh.pericalcarine_6         | 2.47               | .00874                     |
| rh.pericalcarine_4         | 2.57               | .00676                     |
| rh.lateraloccipital_10     | 3.07               | .00178                     |
| rh.lateraloccipital_5      | 2.65               | .00546                     |
| rh.lingual_6               | 4.39               | .00003                     |
| rh.lingual_15              | 2.68               | .00504                     |
| rh.middletemporal_13       | 2.89               | .00295                     |
| rh.bankssts_3              | 4.09               | .00008                     |
| rh.bankssts_6              | 2.65               | .00549                     |
| rh.bankssts_2              | 3.36               | .00079                     |
| rh.insula_10               | 2.7                | .00489                     |
| lh.rostralmiddlefrontal_21 | 2.42               | .00982                     |
| lh.superiorfrontal_23      | 2.71               | .00466                     |
| lh.superiorfrontal_21      | 2.64               | .00564                     |
| lh.superiorfrontal_43      | 2.45               | .00904                     |
| lh.superiorfrontal_41      | 3.09               | .0017                      |
| lh.caudalmiddlefrontal_8   | 2.64               | .0056                      |
| lh.precentral_3            | 2.47               | .0086                      |
| lh.precentral_11           | 2.65               | .00548                     |
| lh.paracentral_4           | 2.9                | .00284                     |

| ROI                          | t Statistic | P Value (corrected) |
|------------------------------|-------------|---------------------|
| lh.caudalanteriorcingulate_3 | 3.12        | .00158              |
| lh.precuneus_7               | 3.74        | .00025              |
| lh.precuneus_15              | 3.58        | .00041              |
| lh.pericalcarine_6           | 2.57        | .00676              |
| lh.lingual_14                | 2.52        | .00763              |
| lh.lingual_10                | 2.45        | .009                |
| lh.lingual_5                 | 2.8         | .00371              |
| lh.lingual_7                 | 2.78        | .00393              |
| lh.fusiform_12               | 2.58        | .00659              |
| lh.middletemporal_5          | 2.56        | .00698              |
| lh.superiortemporal_24       | 3.69        | .00029              |
| lh.superiortemporal_9        | 3.65        | .00033              |
| lh.insula_5                  | 2.8         | .00373              |
| lh.insula_2                  | 2.59        | .00635              |
| lh.insula_16                 | 2.67        | .00516              |
| lh.insula_10                 | 3.44        | .00062              |
| lh.insula_15                 | 2.69        | .00492              |

**Table E2.** Within-Module Connectivity

| ROI                           | t Statistic | P Value (corrected) |
|-------------------------------|-------------|---------------------|
| rh.rostralmiddlefrontal_6     | -2.79       | .0038               |
| rh.superiorfrontal_12         | -2.42       | .00979              |
| rh.superiorfrontal_32         | -2.84       | .00332              |
| rh.superiorfrontal_9          | -3.44       | .00062              |
| rh.rostralanteriorcingulate_2 | -2.5        | .00811              |
| rh.precuneus_8                | -3.32       | .00089              |
| rh.precuneus_20               | -3.15       | .00145              |
| rh.parahippocampal_2          | -2.44       | .00939              |
| lh.lateralorbitofrontal_6     | -3.36       | .00078              |
| lh.precentral_17              | -2.72       | .00453              |
| lh.precentral_7               | -2.71       | .0047               |
| lh.isthmuscingulate_5         | -2.73       | .00446              |
| lh.superiorparietal_5         | -3.44       | .00062              |
| lh.superiorparietal_9         | -2.81       | .00359              |
| lh.superiorparietal_17        | -2.87       | .0031               |
| lh.inferiorparietal_3         | -2.57       | .0067               |
| lh.inferiorparietal_19        | -2.51       | .00778              |
| lh.inferiorparietal_4         | -2.43       | .0096               |
| lh.precuneus_4                | -2.41       | .01003              |
| lh.lateraloccipital_16        | -3.53       | .00048              |
| lh.fusiform_5                 | -2.66       | .00534              |
| lh.insula_3                   | -2.41       | .01012              |

**Table E3.** Participation Coefficient (Between-Module Connectivity)

| ROI                        | t Statistic | P Value (corrected) |
|----------------------------|-------------|---------------------|
| rh.lateralorbitofrontal_5  | -2.44       | .00928              |
| rh.parsopercularis_8       | -4.24       | .00005              |
| rh.parsopercularis_7       | -2.73       | .00451              |
| rh.parsopercularis_6       | -4.12       | .00008              |
| rh.parsopercularis_2       | -3.28       | .001                |
| rh.rostralmiddlefrontal_21 | -2.58       | .00652              |
| rh.rostralmiddlefrontal_16 | -3.04       | .00194              |
| rh.superiorfrontal_39      | -2.95       | .00248              |
| rh.superiorfrontal_30      | -3.4        | .00071              |
| rh.precentral_28           | -2.5        | .00799              |
| rh.precentral_36           | -3.49       | .00053              |
| rh.precentral_5            | -2.77       | .00406              |
| rh.precentral_21           | -2.71       | .00476              |
| rh.precentral_2            | -3.12       | .00154              |
| rh.paracentral_9           | -2.8        | .00369              |
| rh.paracentral_4           | -3.01       | .0021               |
| rh.paracentral_5           | -2.9        | .00282              |
| rh.posteriorcingulate_9    | -3.24       | .00112              |
| rh.isthmuscingulate_3      | -2.98       | .00227              |
| rh.isthmuscingulate_2      | -3.04       | .00194              |
| rh.supramarginal_13        | -2.61       | .00616              |
| rh.superiorparietal_28     | -2.91       | .00276              |
| rh.superiorparietal_1      | -2.8        | .00376              |
| rh.inferiorparietal_3      | -3.39       | .00073              |
| rh.inferiorparietal_22     | -2.86       | .00322              |
| rh.precuneus_5             | -2.58       | .00656              |
| rh.precuneus_23            | -3.31       | .00092              |
| rh.precuneus_18            | -2.76       | .00408              |
| rh.lingual_1               | -2.45       | .00912              |
| rh.parahippocampal_3       | -2.47       | .00868              |
| rh.entorhinal_2            | -2.68       | .00504              |
| rh.inferiortemporal_13     | -2.77       | .00402              |
| rh.middletemporal_16       | -3.95       | .00013              |
| rh.middletemporal_13       | -3.93       | .00014              |
| rh.middletemporal_15       | -2.8        | .00375              |
| rh.middletemporal_6        | -2.5        | .00807              |
| rh.bankssts_3              | -3.22       | .00117              |
| rh.bankssts_2              | -2.6        | .00623              |
| rh.bankssts_1              | -3.45       | .0006               |
| rh.bankssts_5              | -2.88       | .003                |
| lh.lateralorbitofrontal_11 | -3.43       | .00065              |
| lh.parsopercularis_2       | -2.84       | .00337              |
| lh.parsopercularis_9       | -3.6        | .00039              |

| ROI                    | t Statistic | P Value (corrected) |
|------------------------|-------------|---------------------|
| lh.superiorfrontal_42  | -2.99       | .00223              |
| lh.superiorfrontal_24  | -2.58       | .00652              |
| lh.superiorfrontal_43  | -2.6        | .00618              |
| lh.precentral_4        | -2.94       | .00253              |
| lh.postcentral_28      | -2.51       | .00775              |
| lh.postcentral_14      | -2.79       | .00381              |
| lh.postcentral_22      | -2.67       | .00525              |
| lh.postcentral_30      | -2.75       | .00424              |
| lh.postcentral_13      | -2.68       | .00515              |
| lh.postcentral_20      | -2.95       | .00248              |
| lh.supramarginal_9     | -2.61       | .00605              |
| lh.superiorparietal_13 | -2.59       | .00642              |
| lh.superiorparietal_22 | -3.18       | .00134              |
| lh.inferiorparietal_22 | -2.59       | .00637              |
| lh.precuneus_15        | -2.43       | .0096               |
| lh.superiortemporal_21 | -2.94       | .00257              |

For further details on cortical ROI nomenclature, see  
<http://fip.nmr.mgh.harvard.edu/fswiki/CorticalParcellation>.
